# Supplementary material
Source: MDPI journal article supplement (https://www.mdpi.com/2571-8797/2/1/4)
Supplement: s1 [file s1]

## Sheet: Data sheet
	MDO 0.1 % S		LNG		LBG
Net calorific value (MJ/kg)	42.6		48.6		49.3
Well-to-tank GHG-emissions	g/MJ fuel		g/MJ fuel		g/MJ fuel
CO2 (fossil)	14.6		10.5		9.7
CH4	0.021		0.18		0.344828
N2O	<0.001		<0.001		<0.001
Total in CO2eq./MJ fuel	15.314		16.62		21.4241
	MDO 0.1 % S + SCR		LNG		LBG
Emissions to air during tank-to-propeller	g/MJ fuel		g/MJ fuel		g/MJ fuel
CO2 (fossil origin)	75		56		1
CO2 (biogenic origin)	0		0		54
CH4	0.0014		0.411523		0.40568
N2O	0.0038		0.0022		0.0022
NOx	0.22		0.17		0.17
SO2	0.047		0.00056		0.00058
PM10	0.022		0.0043		0.0043
NMVOC	0.059		-		-
NH3	0.005		-		-
Assumptions:
Tank-to-propeller methane slip	2	%
CH4 leakage from anaerobic digestion	1.2	%
CH4 leakage from bio-methane liquefaction	0.5	%
GWP100 for methane	34
GWP100 for N2O	298

## Sheet: Calculations and figures
Case ship basic data
Engine output	16000	kW
Average load	45	%
Engine efficiency @45%load	46	%
Hours per year	4000	h
Functional unit (fuel consumption per 1 year)		225	TJ
Life-cycle GHGs (WTP)
	MDO + SCR	LNG	LBG
	t CO2-eq./year	t CO2-eq./year	t CO2-eq./year
CO2	20160	14962.5	2407.5
CH4	171.36	4525.15	5741.38
N2O	254.79	147.51	147.51
Total	20586.2	19635.2	8296.39
	/ 10^4	/ 10^4	/ 10^4
CO2	2.016	1.49625	0.24075
CH4	0.017136	0.452515	0.574138
N2O	0.025479	0.014751	0.014751
	2.05862	1.96352	0.829639
Total GHGs	MDO + SCR	LNG	LBG
	t CO2-eq./year	t CO2-eq./year	t CO2-eq./year
Well-to-tank	3445.65	3739.5	4820.43
Tank-to-propeller	17140.5	15895.7	3475.96
Total	20586.2	19635.2	8296.39
	/ 10^4	/ 10^4	/ 10^4
Well-to-tank	0.344565	0.37395	0.482043
Tank-to-propeller	1.71405	1.58957	0.347596
	2.05862	1.96352	0.829639
ACIDIFICATION POTENTIAL (TTP)
	MDO + SCR	LNG	LBG
	t SO2-eq./year	t SO2-eq./year	t SO2-eq./year	SO2-eq. factor
NOx	24.75	19.125	19.125	0.5
SO2	10.575	0.126	0.1305	1
NH3	1.8			1.6
Total	37.125	19.251	19.2555
EUTROPHICATION POTENTIAL (TTP)
	MDO + SCR	LNG	LBG
	t NOx-eq./year	t NOx-eq./year	t NOx-eq./year	NOx-eq. factor
NOx	49.5	38.25	38.25	1
NH3	4.1625			3.7
Total	53.6625	38.25	38.25
EMISSIONS OF PARTICLES (TTP)
	MDO + SCR	LNG	LBG
	t/year	t/year	t/year
PM10	4.95	0.9675	0.9675
HUMAN HEALTH DAMAGE (TTP)
	MDO + SCR	LNG	LBG	Characterization factor
	years lost/ kg emission	years lost/ kg emission	years lost/ kg emission
NH3	0.093375			8.3e-05
NOx	2.8215	2.18025	2.18025	5.7e-05
SO2	0.539325	0.006426	0.0066555	5.1e-05
PM10	1.287	0.25155	0.25155	0.00026
Total	4.7412	2.43823	2.43846

## Sheet: CH4 slip
LNG lower heating value		48.6	MJ/kg
LBG lower heating value		49.3	MJ/kg
Life cycle								Tank-to-propeller
LNG			MDO + SCR	LBG				LNG			MDO + SCR	LBG
CH4 slip %	CH4 slip g/MJ fuel	GHG total t/yr. X 10^4		CH4 slip g/MJ fuel	GHG total t/yr. X 10^4			CH4 slip %	CH4 slip g/MJ fuel	GHG total t/yr. X 10^4		CH4 slip g/MJ fuel	GHG total t/yr. X 10^4
0	0	1.6487	2.05862	0	0.519294			0	0	1.27475	1.71405	0	0.037251
0.005	0.102881	1.7274	2.05862	0.10142	0.59688			0.005	0.102881	1.35345	1.71405	0.10142	0.114837
0.01	0.205761	1.80611	2.05862	0.20284	0.674467			0.01	0.205761	1.43216	1.71405	0.20284	0.192423
0.015	0.308642	1.88481	2.05862	0.30426	0.752053			0.015	0.308642	1.51086	1.71405	0.30426	0.27001
0.02	0.411523	1.96352	2.05862	0.40568	0.829639			0.02	0.411523	1.58957	1.71405	0.40568	0.347596
0.025	0.514403	2.04222	2.05862	0.507099	0.907225			0.025	0.514403	1.66827	1.71405	0.507099	0.425182
0.03	0.617284	2.12092	2.05862	0.608519	0.984811			0.03	0.617284	1.74697	1.71405	0.608519	0.502768
0.035	0.720165	2.19963	2.05862	0.709939	1.0624			0.035	0.720165	1.82568	1.71405	0.709939	0.580354
0.04	0.823045	2.27833	2.05862	0.811359	1.13998			0.04	0.823045	1.90438	1.71405	0.811359	0.657941
0.045	0.925926	2.35703	2.05862	0.912779	1.21757			0.045	0.925926	1.98308	1.71405	0.912779	0.735527
0.05	1.02881	2.43574	2.05862	1.0142	1.29516			0.05	1.02881	2.06179	1.71405	1.0142	0.813113
Reduction with LNG and LBG compared to MDO + SCR (life-cycle)								Reduction with LNG and LBG compared to MDO + SCR (TTP)
CH4 slip	LNG: Reduction %	LBG: Reduction %						CH4 slip	LNG: Reduction %	LBG: Reduction %
0	0.199121	0.747746						0	0.256293	0.978267
0.005	0.16089	0.710057						0.005	0.210376	0.933002
0.01	0.122658	0.672369						0.01	0.164459	0.887738
0.015	0.0844271	0.63468						0.015	0.118543	0.842473
0.02	0.0461957	0.596992						0.02	0.0726258	0.797208
0.025	0.00796433	0.559303						0.025	0.026709	0.751943
0.03	-0.0302671	0.521615						0.03	-0.0192079	0.706678
0.035	-0.0684984	0.483926						0.035	-0.0651247	0.661413
0.04	-0.10673	0.446238						0.04	-0.111041	0.616149
0.045	-0.144961	0.408549						0.045	-0.156958	0.570884
0.05	-0.183193	0.37086						0.05	-0.202875	0.525619

## Sheet: Operating costs
Fuel price				SCR O&M costs
MDO	13	€/GJ		5.55	€/MWh
LNG	8	€/GJ
LBG	22	€/GJ
Fuel comsumption
	225000	GJ/year
Operational costs €/1 year of RoPax ferry service
	MDO 0.1 % S	LNG	LBG
Fuel	2925000	1800000	4950000
SCR O&M	159562
Total	3.08456e+06	1800000	4950000
